## Impact on Overall Survival of Radioactive Iodine in Low-Risk Differentiated Thyroid Cancer Patients

Claire Schvartz, Franck Bonnetain, Sandrine Dabakuyo, Mélanie Gauthier, Adèle Cueff, Sandrine Fieffé, Jean-Marie Pochart, Inna Cochet, Elodie Crevisy, Audrey Dalac, Dimitri Papathanassiou, and Michel Toubeau

Thyroid Cancer Registry (C.S., S.D., A.D.) and Thyroid Unit, Departments of Endocrinology and Nuclear Medicine (S.F., J.-M.P.) and Nuclear Medicine (D.P.), Institut Jean Godinot, 51100 Reims, France; Biostatistics and Epidemiological Unit EA 4184 (F.B., S.D., M.G., A.C.), Department of Nuclear Medicine (M.T., I.C.), Centre Georges François Leclerc, 21079 Dijon, France; and Department of Endocrinology (E.C.), Centre Hospitalier-Universitaire, 21034 Dijon, France

**Context:** American Thyroid Association and European Thyroid Association guidelines cannot recommend for or against radioactive iodine (RAI) ablation after surgery in low-risk differentiated thyroid cancer (DTC) patients.

**Objectives:** The objective of the study was to assess the survival benefit of RAI for these patients.

**Design:** We identified 1298 DTC patients at low risk treated between 1975 and 2005. Logistic regressions were used to identify variables associated to RAI and to calculate the propensity score to receive RAI after surgery. We compared overall survival (OS) and disease-free survival (DFS) according to RAI with the log-rank tests and univariate and multivariate Cox analyses. Analyses stratified on propensity score were also performed.

**Results:** Median follow-up was 10.3 yr. Nine hundred eleven patients received RAI after surgery vs. 387 patients without RAI after surgery. Using univariate analysis, 10-yr OS was found to be 95.8% in patients without RAI after surgery vs. 94.6% in RAI after surgery ( $P = 0.006$ ), and 10-yr DFS was found to be 93.1% vs. 88.7% ( $P = 0.001$ ). All clinical factors except sex were significantly associated with RAI. Using multivariate Cox analyses, RAI was neither significantly nor independently associated with OS ( $P = 0.243$ ) and DFS ( $P = 0.2659$ ). After stratification on propensity score, Cox univariate analyses showed that OS did not differ according to RAI ( $P = 0.3524$ ), with a hazard ratio for RAI of 0.75 (95% confidence interval 0.40–1.38). Similarly, DFS did not differ ( $P = 0.48$ ) with a stratified univariate hazard ratio of 1.11 (95% confidence interval 0.73–1.70).

**Conclusion:** With a long-term follow-up of 10.3 yr, we failed to prove any survival benefit of RAI after surgery in a large cohort of low-risk DTC patients. (*J Clin Endocrinol Metab* 97: 1526–1535, 2012)

Differentiated thyroid cancer (DTC) is the most common endocrine malignancy with a rapidly rising incidence worldwide (1). In France, the increase of incidence is 8.19 and 6.29% per year in women and men, respectively, particularly due to the papillary type with a tumor size of less than 4 cm (2). Recent American and European

guidelines (3, 4) recommend radioactive iodine (RAI) ablation when the combination of age, tumor size, lymph node status, and individual histology predicts an intermediate to high risk of recurrence or death from thyroid cancer. However, RAI ablation is not recommended for very low-risk patients with papillary cancer less than 1 cm and

ISSN Print 0021-972X ISSN Online 1945-7197

Printed in U.S.A.

Copyright © 2012 by The Endocrine Society

doi: 10.1210/jc.2011-2512 Received September 8, 2011. Accepted January 23, 2012.

First Published Online February 16, 2012

Abbreviations: ATA, American Thyroid Association; AUC, area under the receiver operating characteristic curve; CI, confidence interval; DFS, disease-free survival; DTC, differentiated thyroid cancer; ETA, European Thyroid Association; M, pathological assessment of the distant metastases; Nx, without lymph node dissection; OS, overall survival; pN, pathological assessment of the regional lymph nodes; pT, pathological assessment of the primary tumor; QoL, quality of life; RAI, radioactive iodine; Tg, thyroglobulin.

confined to the thyroid. When the primary tumor is confined to the thyroid, is between 1 and 4 cm, and lacks other risk factors (worrisome histological subtypes, intrathyroidal vascular invasion, multifocal disease), patients are considered to be at low risk of death or recurrence. For these patients, RAI ablation is still controversial because of conflicting data concerning the benefit of the risk of recurrence (5–9).

To assess the survival benefit of RAI treatment in low-risk patients, we conducted a retrospective multicentric study comparing the clinical outcome of two cohorts of low-risk patients: one group with RAI after surgery and the other group without RAI after surgery.

## Patients and Methods

Since 1975, the French thyroid cancer registry in Reims (France) has collected population-based data on all incidentally discovered thyroid cancers diagnosed in the districts of Champagne-Ardenne and Picardie. In Dijon, the more recent hospital-based thyroid cancer registry has collected all medical data for patients with DTC diagnosed in the districts of Bourgogne and Franche-Comté. Patients were referred to this institution for RAI treatment since 1990. We performed a retrospective cohort study considering all patients who were treated for a well-differentiated thyroid cancer between January 1975 and December 2004 at these two institutions.

Among patients with a papillary or follicular thyroid carcinoma, we considered only those at low risk of recurrence and death. Low-risk patients were defined according to the American Thyroid Association (ATA) and European Thyroid Association (ETA) criteria as follows (3, 4): complete tumor resection, multifocal pT (pathological assessment of the primary tumor) 1 less than 1 cm, pT1 greater than 1 cm, pT2, pN0, M0, using American Joint Committee on Cancer/Union for International Cancer Control staging sixth edition (10), corresponding to stage 1 for patients under 45 yr old and stages 1 and 2 for patients over 45 yr old. We also included patients pT1 and pT2 without lymph node dissection (Nx). Patients with unifocal pT1 less than 1 cm (very low risk) and pT4, pT3, pN (pathological assessment of the regional lymph nodes) 1, and M (pathological assessment of the distant metastases) 1 (high risk) or with a histological diagnosis of anaplastic thyroid cancer were excluded from this study.

All low-risk patients were initially treated by surgery, lobectomy, or thyroidectomy. After surgery in Reims, RAI was administered according to prognostic factors (age >45 yr, tumor size >30 mm). In Dijon, all patients were treated with <sup>131</sup>I. The RAI ablative treatment was administered 1–3 months after total thyroidectomy when the TSH level was greater than 30 mIU/liter. A posttherapy scan was performed between 3 and 5 d after the dose was initially administered. The mean dose of RAI was 90 mCi (sd 25). Eighty-eight percent of the patients received 100 mCi and 12% of the patients received a lower dose of RAI (20 mCi). All patients were then treated with LT4 therapy to obtain a TSH level suppression.

## Follow-up

Patients were followed up with similar protocols at the two institutions, each year for 5 yr after the initial treatment, and then every fifth year. Follow-up examinations included a clinical examination, a serum thyroglobulin (Tg) with Tg antibodies determination (since 1980) and an ultrasonography of the neck (since 1983). For patients treated with RAI, a diagnostic <sup>131</sup>-iodine whole-body scan, and a stimulated serum Tg and Tg antibody determination were also performed. In the presence of a significantly elevated level of Tg and/or Tg antibodies, recurrences were searched and documented using various imaging modalities and histological proof when necessary.

## Clinical end points

Overall survival (OS) was defined as the time interval from the date of diagnosis to death (all causes). Surviving patients were censored at the last follow-up.

Disease-free survival (DFS) was defined as the time interval from the date of the diagnosis to the date of recurrence (local, distant), second cancer, or death (all causes), whichever occurred first. Surviving patients free of recurrence were censored at the last follow-up.

A recurrence was defined as the reappearance of the disease. Patients were considered to have a recurrent disease if any of the following conditions were met: cytological- or histological-proved lymph nodes or local tumor recurrence, <sup>131</sup>-iodine whole-body scan, or other imaging modality highly suspicious for metastatic disease. Biochemical evidence of the persisting disease with a high Tg and/or Tg antibody level was not considered as a relapse without proof of recurrent disease.

## Statistical analyses

All analyses were performed with Stata (version 11; Stata Corp, College Station, TX) with bilateral  $\alpha$ -type one error of 5%.

Continuous variables were described using mean (sd) and median (Min-Max) and compared using the Mann and Whitney test. Categorical variables were described using frequency and percent and compared using  $\chi^2$  or the Fisher exact test.

The OS and DFS curves were estimated using Kaplan-Meier estimation and analyzed with the median and rate with a 95% confidence interval (CI). The survival curves were compared using the log-rank test. The median follow-up was estimated using the reverse Kaplan-Meier method.

Univariate and multivariate Cox models were first performed to estimate hazard ratio with a 95% CI and to identify the independent variables associated with survival duration. Internal validation was checked using bootstrapping (1500 replications).

Using the final multivariate model, we computed the Harrell's C statistic for discrimination (a Harrell's C index of 0.5 indicates no predictive discrimination and a Harrell's C index of 1.0 indicates perfect separation of patients).

We then performed a univariate logistic regression to identify which variables were associated with RAI treatment. Based on univariate *P* value (univariate *P* < 0.05) and clinical relevance, the following variables were considered for logistic multivariate analysis: age ( $\leq 45$  vs. >45 yr old), sex, period of diagnosis (1998 or before vs. after 1998), thyroid surgery (lobectomy vs. total or near total thyroidectomy), node surgery, histology, and pT. The final multivariate logistic model was used to calculate the probability for each patient to have RAI, which is the propensity score (11–13). We computed the area under the receiver operating

**TABLE 1.** Patient characteristics according to RAI

|                     | No RAI (n = 387)<br>n (%) | RAI (n = 911)<br>n (%) | P value <sup>a</sup> | Total (n = 1298)<br>n (%) |
|---------------------|---------------------------|------------------------|----------------------|---------------------------|
| Age (yr)            |                           |                        |                      |                           |
| ≤45                 | 270 (69.8)                | 324 (35.6)             | <0.0001              | 594 (45.8)                |
| >45                 | 117 (30.2)                | 587 (64.4)             |                      | 704 (54.2)                |
| Sex                 |                           |                        |                      |                           |
| Male                | 54 (14.0)                 | 161 (17.7)             | 0.099                | 215 (16.6)                |
| Female              | 333 (86.1)                | 750 (82.3)             |                      | 1083 (83.4)               |
| Period of diagnosis |                           |                        |                      |                           |
| ≤1998               | 224 (57.9)                | 452 (49.6)             | 0.006                | 676 (52.1)                |
| >1998               | 163 (42.1)                | 459 (50.4)             |                      | 622 (47.9)                |
| Thyroid surgery     |                           |                        |                      |                           |
| Lobectomy           | 237 (61.2)                | 8 (0.9)                | <0.0001              | 245 (18.9)                |
| Thyroidectomy       | 147 (38.0)                | 903 (99.1)             |                      | 1050 (81.1)               |
| Missing             | 3 (0.8)                   | 0                      |                      | 3                         |
| pN                  |                           |                        |                      |                           |
| pN0                 | 282 (72.9)                | 429 (47.1)             | <0.0001              | 711 (54.8)                |
| Nx                  | 105 (27.1)                | 482 (52.9)             |                      | 587 (45.2)                |
| Histology           |                           |                        |                      |                           |
| Papillary           | 240 (62.0)                | 700 (76.8)             | <0.0001              | 940 (72.4)                |
| Follicular          | 147 (38.0)                | 211 (23.2)             |                      | 358 (27.6)                |
| pT                  |                           |                        |                      |                           |
| pT1 ≤20 mm          | 262 (67.7)                | 539 (59.2)             | 0.004                | 801 (61.7)                |
| pT2 (20–40) mm      | 125 (32.3)                | 372 (40.8)             |                      | 497 (38.3)                |
| RAI                 |                           |                        |                      |                           |
| No RAI              |                           |                        |                      | 387 (29.8)                |
| <100 mCi            |                           |                        |                      | 109 (8.4)                 |
| 100 mCi             |                           |                        |                      | 802 (61.8)                |
| District            |                           |                        |                      |                           |
| Bourgogne           | 1 (0.2)                   | 221 (24.3)             | <0.0001              | 222 (17.1)                |
| Franche-Comté       | 0 (0)                     | 25 (2.7)               |                      | 25 (1.9)                  |
| Champagne-Ardenne   | 289 (74.7)                | 481 (52.8)             |                      | 770 (59.3)                |
| Picardie            | 79 (20.4)                 | 151 (16.6)             |                      | 230 (17.7)                |
| Other               | 18 (4.7)                  | 33 (3.6)               |                      | 51 (3.9)                  |

<sup>a</sup> Mann-Whitney Wilcoxon.

characteristic curve (AUC) to check the discriminate capability of the final multivariate logistic model.

Finally, univariate Cox model stratified on propensity score was performed to estimate RAI hazard ratio with 95% CI, whereas survival curves were produced and adjusted on propensity score to illustrate these results.

## Results

We analyzed the data from the 3228 DTC patients treated between 1975 and 2004. According to ATA and ETA criteria, 965 patients (27%) were identified as very low risk, 965 (27%) as high risk, and 1298 (46%) as low risk. The clinical characteristics of the 1298 low-risk patients are found in Table 1. Mean age at diagnosis was  $46.6 \pm 14$  yr (mean  $\pm$  SD). Female patients represented 83% of the cohort. Seventy-two percent of the patients had a papillary cancer and 28% had a follicular cancer. Eight hundred one tumors were classified as pT1 and 497 as pT2.

Total or near-total thyroidectomy was performed in 81% of the patients. Lymph node dissection was performed in 55% of the cases. Nine hundred eleven patients

(70%) received RAI after surgery *vs.* 387 (30%) who did not receive RAI after surgery.

## OS and DFS according to RAI

Median follow-up was 10.3 yr (95% CI 9.8–10.7 yr). The OS and DFS curves by Kaplan-Meier estimation were significantly different according to RAI (Fig. 1). The 10-yr OS rates were 94.6% [95% CI (92.55–96.06%)] for patients treated with RAI *vs.* 95.8% [95% CI (92.98–97.53%)] for patients not treated with RAI ( $P = 0.006$ ). The 10-yr DFS rates were 88.7% [95% CI (85.96–90.97%)] for patients treated with RAI and 93.1% [95% CI (89.68–95.47%)] for patients not treated with RAI ( $P = 0.0013$ ). Nineteen recurrences, 61 second cancers, and 105 deaths were recorded. Fifteen recurrences (1.6%) were observed in patients who had RAI and four recurrences (1.0%) were observed in patients who had only surgery. Recurrences consisted of six nodal recurrences; two local recurrences; seven distant metastases (in one patient, a distant metastasis was diagnosed simultaneously with a nodal recurrence) in patients who had RAI;

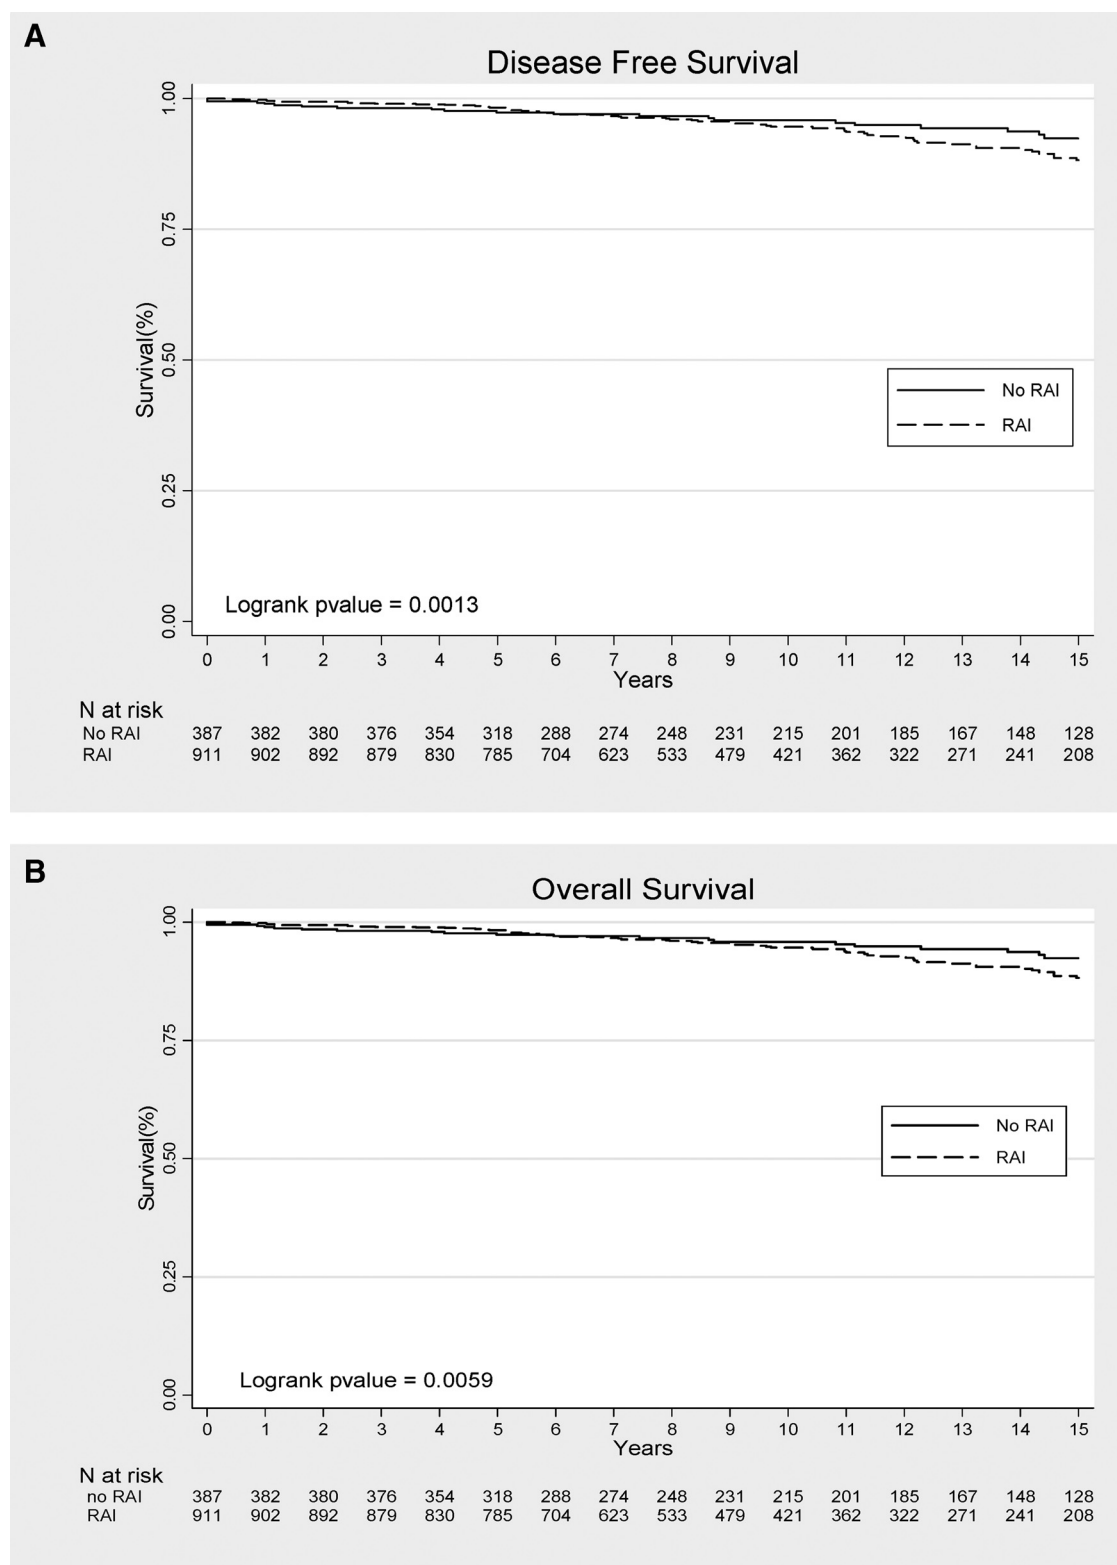

**FIG. 1.** DFS (A) and OS (B) according to RAI (Kaplan-Meier estimation).

and one nodal recurrence and three distant metastases in patients who had only surgery.

The OS and DFS rates did not differ significantly between patients who had the standard dose of 100 mCi and those who had the lower dose of 20 mCi. We observed no

recurrences, and only seven second cancers (including four patients with second cancers followed by a death) and 13 deaths in patients receiving 20 mCi.

Univariate and multivariate Cox analyses showed that the parameters of period of diagnosis, histology, pT, pN,

and districts did not have a significant influence on OS (Table 2) and DFS (Table 3). Based on multivariate Cox analysis, age and sex were the only two independent prognostic factors associated with DFS and OS. If RAI had a significant and deleterious effect on survival in univariate analysis, this effect disappeared after the adjustment was performed on the covariates in the multivariate analysis. All results from multivariate models were confirmed by bootstrapping. The Harrell C Index was 0.77 for OS and 0.70 for DFS.

### Predictive factors for RAI treatment

Districts were not a factor because the patients from Bourgogne and Franche-Comté systematically received RAI, whereas in both Champagne-Ardenne and Picardie, the patients received RAI according to their known prognostic factors (Table 1).

As shown with univariate logistic regression (Table 4), the clinical and medical characteristics significantly associated with RAI treatment were: age greater than 45 yr, male gender, a diagnosis before 1998, total and subtotal

thyroidectomy, lymph node dissection, papillary histology, and pT2.

Multivariate logistic regression showed that all of these variables, except sex, were independently associated with RAI (Table 4). AUC was equal to 0.87 (95% CI 0.88–0.92). This model was retained to construct the propensity score.

As illustrated in Fig. 2, univariate analyses showed that the OS curves (adjusted on propensity score) did not differ according to RAI (log-rank *P* value stratified on propensity score = 0.3524). Univariate hazard ratio for RAI was equal to 0.75 (95% CI 0.40–1.38).

Similarly, DFS curves (adjusted on propensity score) did not differ according to RAI (log-rank *P* value stratified on propensity score = 0.4800). Univariate hazard ratio for RAI was equal to 1.11 (95% CI 0.73–1.70).

### Discussion

In this large cohort of low-risk DTC patients with a long-term follow-up, DFS and OS did not significantly differ

**TABLE 2.** Univariate and multivariate Cox analyses for OS

|                     | Univariate |              |                | Multivariate<br>(n = 1295) |              |                | Bootstrapping <i>P</i> value<br>1500 replications |
|---------------------|------------|--------------|----------------|----------------------------|--------------|----------------|---------------------------------------------------|
|                     | HR         | 95% CI       | <i>P</i> value | HR                         | 95% CI       | <i>P</i> value |                                                   |
| RAI                 |            |              |                |                            |              |                |                                                   |
| No                  | 1          |              |                |                            |              |                |                                                   |
| Yes                 | 1.92       | (1.20–3.07)  | 0.007          | 0.69                       | (0.37–1.29)  | 0.243          | 0.318                                             |
| Age (yr)            |            |              |                |                            |              |                |                                                   |
| ≤45                 | 1          |              |                | 1                          |              |                |                                                   |
| >45                 | 7.60       | (4.51–12.80) | <0.0001        | 7.70                       | (4.45–13.32) | <0.0001        | <0.0001                                           |
| Sex                 |            |              |                |                            |              |                |                                                   |
| Male                | 1          |              |                | 1                          |              |                |                                                   |
| Female              | 0.49       | (0.31–0.77)  | 0.002          | 0.41                       | (0.26–0.67)  | <0.0001        | <0.0001                                           |
| Period of diagnosis |            |              |                |                            |              |                |                                                   |
| ≤1998               | 1          |              |                | 1                          |              |                |                                                   |
| >1998               | 1.07       | (0.59–1.93)  | 0.948          | 0.88                       | (0.48–1.61)  | 0.675          | 0.697                                             |
| Thyroid surgery     |            |              |                |                            |              |                |                                                   |
| Lobectomy           | 1          |              |                | 1                          |              |                |                                                   |
| Thyroidectomy       | 2.88       | (1.50–5.53)  | 0.001          | 1.02                       | (1.00–1.05)  | 0.108          | 0.138                                             |
| pN                  |            |              |                |                            |              |                |                                                   |
| pN0                 | 1          |              |                | 1                          |              |                |                                                   |
| Nx                  | 1.20       | (0.82–1.77)  | 0.348          | 0.99                       | (0.65–1.49)  | 0.947          | 0.949                                             |
| Histology           |            |              |                |                            |              |                |                                                   |
| Papillary           | 1          |              |                | 1                          |              |                |                                                   |
| Follicular          | 1.33       | (0.90–1.96)  | 0.155          | 1.36                       | (0.90–2.05)  | 0.142          | 0.139                                             |
| pT                  |            |              |                |                            |              |                |                                                   |
| pT1 ≤20 mm          | 1          |              |                | 1                          |              |                |                                                   |
| pT2 (20–40) mm      | 1.34       | (0.91–1.96)  | 0.136          | 1.31                       | (0.88–1.95)  | 0.187          | 0.192                                             |
| District            |            |              |                |                            |              |                |                                                   |
| Bourgogne           | 1          |              | 0.7073         | 1                          |              | 0.8250         | 0.9299                                            |
| Franche-Comté       | 1.75       | (0.38–8.12)  |                | 1.78                       | (0.38–8.35)  |                |                                                   |
| Champagne-Ardenne   | 1.12       | (0.55–2.27)  |                | 1.13                       | (0.54–2.37)  |                |                                                   |
| Picardie            | 1.52       | (0.69–3.32)  |                | 1.40                       | (0.63–3.11)  |                |                                                   |
| Other               | 1.21       | (0.37–3.96)  |                | 1.48                       | (0.45–4.88)  |                |                                                   |
|                     |            |              |                | Harrell C Index            | 0.77         |                |                                                   |

HR, Hazard ratio.



**TABLE 3.** Univariate and multivariate Cox analyses for DFS

|                     | Univariate |             |         | Multivariate<br>(n = 1295) |             |         | Bootstrapping P value<br>1500 replications |
|---------------------|------------|-------------|---------|----------------------------|-------------|---------|--------------------------------------------|
|                     | HR         | 95% CI      | P value | HR                         | 95% CI      | P value |                                            |
| RAI                 |            |             |         |                            |             |         |                                            |
| No                  | 1          |             |         |                            |             |         |                                            |
| Yes                 | 1.86       | (1.27–2.74) | 0.002   | 0.73                       | (0.43–1.25) | 0.259   | 0.278                                      |
| Age (yr)            |            |             |         |                            |             |         |                                            |
| ≤45                 | 1          |             |         | 1                          |             |         |                                            |
| >45                 | 5.01       | (3.43–7.31) | <0.0001 | 4.86                       | (3.26–7.25) | <0.0001 | <0.0001                                    |
| Sex                 |            |             |         |                            |             |         |                                            |
| Male                | 1          |             |         | 1                          |             |         |                                            |
| Female              | 0.69       | (0.46–1.04) | 0.078   | 0.64                       | (0.42–0.96) | 0.033   | 0.036                                      |
| Period of diagnosis |            |             |         |                            |             |         |                                            |
| ≤1998               | 1          |             |         | 1                          |             |         |                                            |
| >1998               | 1.18       | (0.76–1.84) | 0.460   | 0.95                       | (0.61–1.51) | 0.854   | 0.864                                      |
| Thyroid surgery     |            |             |         |                            |             |         |                                            |
| Lobectomy           | 1          |             |         | 1                          |             |         |                                            |
| Thyroidectomy       | 2.50       | (1.51–4.13) | <0.0001 | 1.68                       | (0.86–3.31) | 0.131   | 0.146                                      |
| pN                  |            |             |         |                            |             |         |                                            |
| pN0                 | 1          |             |         | 1                          |             |         |                                            |
| Nx                  | 1.31       | (0.95–1.79) | 0.097   | 1.17                       | (0.85–1.64) | 0.365   | 0.365                                      |
| Histology           |            |             |         |                            |             |         |                                            |
| Papillary           | 1          |             |         | 1                          |             |         |                                            |
| Follicular          | 0.97       | (0.70–1.35) | 0.867   | 0.73                       | (0.43–1.25) | 0.259   | 0.942                                      |
| pT                  |            |             |         |                            |             |         |                                            |
| pT1 ≤20 mm          | 1          |             |         | 1                          |             |         |                                            |
| pT2 (20–40) mm      | 1.15       | (0.84–1.58) | 0.382   | 1.25                       | (0.37–4.22) | 0.722   | 0.322                                      |
| District            |            |             |         |                            |             |         |                                            |
| Bourgogne           | 1          |             | 0.8129  | 1                          |             | 0.957   | 0.9978                                     |
| Franche-Comté       | 1.17       | (0.35–3.93) |         | 1.25                       | (0.37–4.22) |         |                                            |
| Champagne-Ardenne   | 0.84       | (0.52–1.38) |         | 0.90                       | (0.54–1.51) |         |                                            |
| Picardie            | 0.94       | (0.53–1.68) |         | 0.92                       | (0.51–1.67) |         |                                            |
| Other               | 0.57       | (0.19–1.68) |         | 0.72                       | (0.24–2.12) |         |                                            |
|                     |            |             |         | Harrell C Index            | 0.70        |         |                                            |

HR, Hazard ratio.

between patients who received or did not receive RAI after surgery. Our study was specifically focused on these low-risk patients, for whom conflicting data have been previously reported in the literature concerning the potential benefits of RAI ablative therapy. No worldwide consensus has been obtained, resulting in the absence of recommendations for RAI in the American and European guidelines (3, 4). This question remains extremely important because the majority of cases in clinical practice are low-risk patients. In a detailed analysis of peer-reviewed literature, Sacks *et al.* (14) pointed out several deficiencies in the numerous staging systems used to define DTC patients. This has led to various definitions of low-risk patients, making comparisons difficult between institutions.

To define patients at low risk, we used, in this retrospective study, the criteria recently proposed by the ATA and the ETA: all low-risk patients were pT1 or pT2, pN0, or M0. Nx patients were also included. Although pN0 patients are considered only in the low-risk definition of the ATA and ETA, Nx patients represent a significant percentage of low-risk patients treated in institutions,

which can exceed 50% (15), 45% of our cohort. They were grouped with the pN0 patients. We verified by the analysis that the OS and DFS curves did not significantly differ between pN0 and Nx patients.

Finally, all patients of the cohort were M0, pN0, or Nx, theoretically minimizing the risk of recurrence and death. This may explain the very low rate of clinical recurrences we observed (1.5%). This recurrence rate is quite similar to the rate of recurrence recently reported by Tuttle *et al.* (16). Applying the ATA definition of low risk to a cohort of 588 DTC patients with a follow-up of 7 yr, recurrent disease was observed in only 1% of low-risk patients. Hay *et al.* at the Mayo Clinic (17) studied a large cohort of 2512 patients with a papillary carcinoma. Two thousand ninety-nine patients presented as low risk (MACIS score <6, where MACIS is the scoring system of the Mayo Clinic: distant Metastases, Age, Completeness of surgery, Invasion of extra-thyroidal tissues, and the Size of the thyroid tumor). For the node-negative group (636 patients), the 20-yr tumor recurrence rates were 3.4% after surgery alone and 4.3% after surgery and RAI, respectively. The 10-yr recurrence rates

**TABLE 4.** Univariate and multivariate logistic regression for RAI

|                     | Univariate |             |         | Multivariate<br>(n = 1295) |              |         |
|---------------------|------------|-------------|---------|----------------------------|--------------|---------|
|                     | OR         | 95% CI      | P value | OR                         | 95% CI       | P value |
| Age (yr)            |            |             |         |                            |              |         |
| ≤45                 | 1          |             |         | 1                          |              |         |
| >45                 | 4.2        | (3.2–5.4)   | <0.0001 | 3.54                       | (2.45–5.12)  | <0.0001 |
| Sex                 |            |             |         |                            |              |         |
| Male                | 1          |             |         | 1                          |              |         |
| Female              | 0.8        | (0.5–1.1)   | 0.100   | 0.66                       | (0.38–1.14)  | 0.138   |
| Period of diagnosis |            |             |         |                            |              |         |
| ≤1998               | 1          |             |         | 1                          |              |         |
| >1998               | 1.4        | (1.1–1.8)   | 0.006   | 0.59                       | (0.41–0.87)  | 0.007   |
| Thyroid surgery     |            |             |         |                            |              |         |
| Lobectomy           | 1          |             |         | 1                          |              |         |
| Thyroidectomy       | 182        | (88.1–376.) | <0.0001 | 176.3                      | (82.2–378.2) | <0.0001 |
| pN                  |            |             |         |                            |              |         |
| Nx                  | 1          |             |         | 1                          |              |         |
| pN0                 | 3.0        | (2.3–3.9)   | <0.0001 | 2.42                       | (1.66–3.52)  | <0.0001 |
| Histology           |            |             |         |                            |              |         |
| Papillary           | 1          |             |         | 1                          |              |         |
| Follicular          | 0.5        | (0.4–0.6)   | <0.0001 | 0.52                       | (0.33–0.79)  | 0.003   |
| pT                  |            |             |         |                            |              |         |
| pT1 ≤20 mm          | 1          |             |         | 1                          |              |         |
| pT2 (20–40) mm      | 1.4        | (1.1–1.9)   | 0.004   | 2.71                       | (1.77–4.17)  | <0.0001 |
| AUC                 |            |             |         | 0.89                       | (0.88–0.92)  |         |

OR, Odds ratio.

were not mentioned in this subgroup but should logically be inferior and similar to ours.

The overall survival of the patients was also excellent. The OS rate at 10 yr was 94.5%, meaning that the thyroid specific mortality was lower than 5%. This is consistent with the 1.7% disease-specific mortality rate at 10 yr estimated by Sawka *et al.* (18) in low-risk DTC patients in a detailed review of multiple studies. Such very low recurrence and mortality rates are questionable and reinforce the importance of our study to clarify the real usefulness of RAI.

Looking at DFS and OS, we observed by univariate analysis that RAI did not prolong survival. It was confirmed by multivariate analysis that only two significant parameters, age and sex, were related to survival but not RAI.

For a majority of patients, RAI was not given at random but only after studying the clinical characteristics of the patients. To take into account the specific parameters related to the nonrandom decision of RAI treatment, we used the Propensity Score method. Applied to an observational study, this statistical method aims to balance the clinical covariates and parameters between the groups treated and not treated with RAI and approaches the conditions of a randomized study. After stratification on propensity score, DFS and OS did not significantly differ among patients who received or did not receive RAI. Only two studies examining the usefulness of RAI in DTC pa-

tients have used the propensity score analysis. Focusing on 14,545 patients of the Surveillance, Epidemiology and End Results American database, Podnos *et al.* (19) did not find any significant effect of RAI in overall survival after adjustment on propensity score. Contrary to our study, DFS was not studied by Podnos *et al.* They focused their analyses on patients with only papillary histology and on all risk patients (very low, low, and high). Moreover, the number of low-risk patients was not reported and the median follow-up was only 7.9 yr. Jonklaas *et al.* (20) with a prospective cohort of 2936 DTC patients of all stages showed that RAI was beneficial only for stage II, III, and IV patients. A side effect of RAI on OS was observed in stage I patients but was not confirmed by a second analysis (21). Using Propensity Score analysis in stage I patients, DFS at 5 yr did not significantly differ between patients treated and not treated with RAI. This result agrees with ours; it must be noted, however, that the median follow-up was very short in the two analyses, 3 and 5 yr, respectively.

Our study has some limitations. First, given the excellent survival of the low-risk patients, the small number of recorded events did not allow us to study the impact of RAI in each stratum of the propensity score due to statistical power limitations. Second, patients with papillary and follicular carcinomas were combined in our analysis as in the study by Jonklaas *et al.* (20). Diagnostic criteria of DTC have changed during the last 40 yr. Many thyroid carcinomas, considered to be follicular carcinomas in the past,

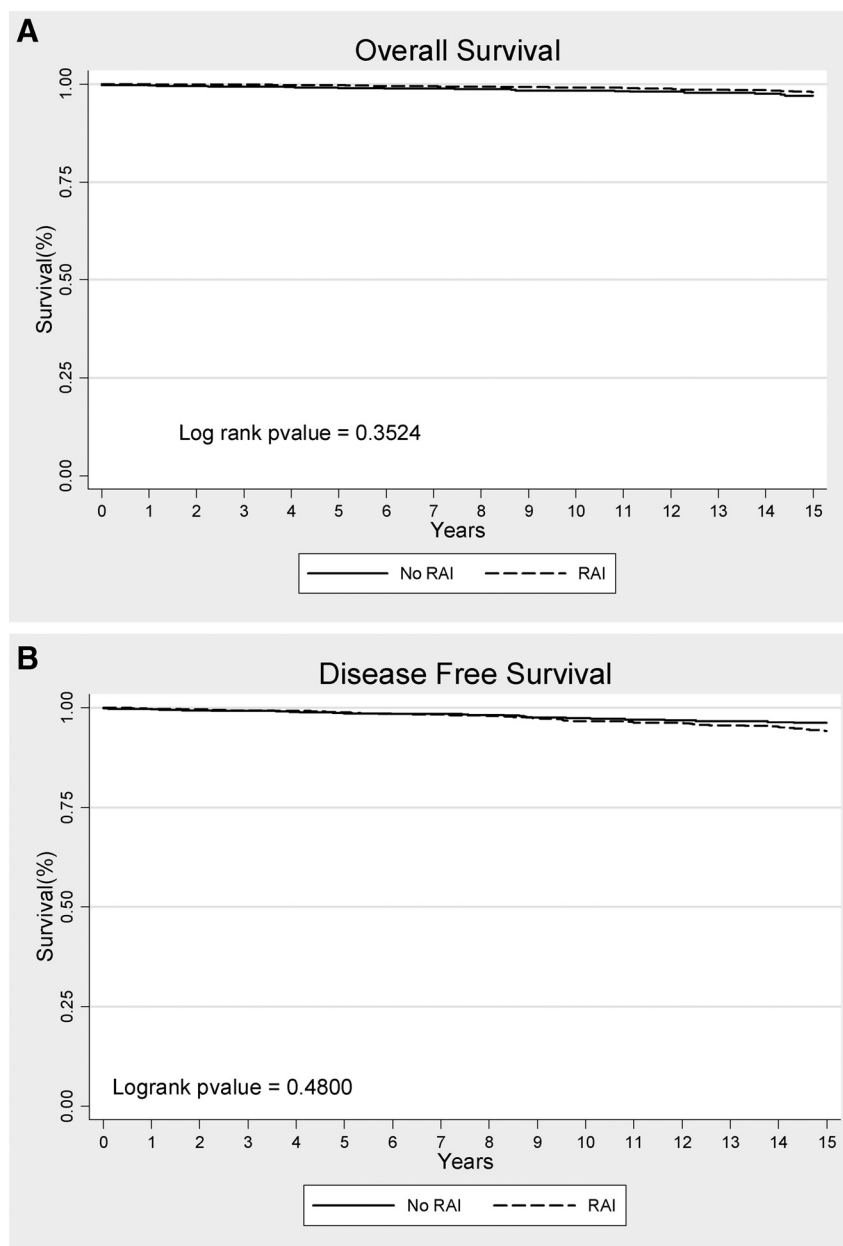

**FIG. 2.** OS (A) and DFS (B) according to RAI (Kaplan-Meier estimation) adjusted on propensity score. Survival curves were estimated with an adjustment on the propensity score for receiving RAI. Log-rank tests were stratified on the propensity score for receiving RAI.

would be classified today as papillary carcinomas of the follicular variant (22). Moreover, distinguishing the follicular variant of papillary carcinoma from the follicular carcinoma remains problematic for experienced pathologists (23, 24). Although prognosis may differ between papillary thyroid carcinoma and follicular thyroid carcinoma, we observed no significant survival differences in this cohort of low-risk patients. A few patients with more aggressive histological subtypes such as tall cell, oncocytic, columnar, insular, and solid variants, which were not described by pathologists before 1988, may also have been included in this cohort. These patients should have therefore been considered as high risk rather than low risk,

even though all of them had received RAI. This fact did not alter our results.

In this study, by inclusion of pT1 greater than 1 cm and pT2 less than 4 cm, we increased the number of patients for whom RAI treatment was associated with no survival benefit, beyond the numbers that would be included in the categories for which the ATA and ETA guidelines recommended no RAI therapy. If confirmed, these results mean that these patients could also be designated as very low risk. Since the early studies of Mazzaferri and Young (25), numerous studies have attempted to demonstrate the role of RAI, broader ranges of patients identified, by various staging methods, as low risk have been studied. The analyses have included cause specific survivals and DFS (17, 19, 20, 26). These patients, whose diseases fall within a broader definition of low risk, appear not to have benefited from RAI therapy. Recently summarizing the most rigorous studies adjusted for prognostic factors, Sawka *et al.* (27) took into account the various definitions of low risk and found no evidence of survival benefit related to RAI, particularly in low-risk patients. Results are mixed regarding the effect of RAI on recurrence, but the majority of studies do not demonstrate a significant reduction of recurrences in low-risk patients. Additionally, by examining medical practice in the last 50 yr, Hay (28) observed an upward trend in using RAI from 1960 to 1990; there was no significant change in either the cause-specific mortality or the outcome during the 5 decades from 1950 to 1999. He concluded that the outcome of these results should raise serious doubts about the efficacy of RAI in patients with low risk.

In conclusion, our study was specifically dedicated to a large cohort of low-risk patients, defined by ATA and ETA criteria, for whom no clear recommendations are known to date. For the ATA, a selected use of RAI is suggested for only some patients who are at higher risk in this subgroup. For the ETA, despite uncertainties as to whether RAI should be administered to all or to specifically selected patients, a probable indication is ultimately retained for all. Our results show insufficient evi-



dence of a beneficial effect of RAI after surgery in low-risk DTC patients. Based on the results of the two different statistical approaches, we demonstrate the absence of a survival benefit related to RAI. Our results reinforce the conclusions of Sawka *et al.* (27) and suggest that low-risk patients should not be overtreated. The rare complications and side effects of RAI should also be considered, and after surgery, RAI treatment should be reserved for only high-risk patients.

These data may have important practical implications because the majority of cases in clinical practice involve low-risk patients. To clarify the clinical benefit of RAI treatment, taking into account the excellent overall survival of these low-risk patients, a randomized controlled study seems to be difficult to perform. A prospective epidemiological study matching patients on the propensity score and also focusing on both recurrences and health-related quality of life (QoL) could be performed to obtain more conclusive data about the clinical benefit of RAI in low-risk patients. In fact, if a treatment has no impact on OS, it may have a clinical benefit or harm for the patients regarding QoL through recurrences. QoL is considered as a clinical outcome *per se* and as the second primary outcome by the Food and Drug Administration when evaluating treatments in oncology (29). When taking into account that few prospective studies have extensively explored this outcome in low-risk patients, we believe that such a study would help definitively address the question of the clinical added value of RAI after surgery in low-risk DTC patients.

## Acknowledgments

All authors of this research paper have directly participated in the planning, execution, or analysis of the study. All authors of this paper have read and approved the final version submitted. The contents of this manuscript have not been copyrighted or published previously. The contents of this manuscript are not now under consideration for publication elsewhere. The contents of this manuscript will not be copyrighted, submitted, or published elsewhere while acceptance by the Journal is under consideration. All directly related manuscripts or abstracts, published or unpublished, by one or more authors of this paper have been included with the manuscript submission.

Address all correspondence and requests for reprints to: Dr. Franck Bonnetain (Ph.D.), Head of Biostatistic and Epidemiological Unit (EA 4184), Co-coordinator of Clinical Research Platform “Qualité de Vie et Cancer,” Centre Georges François Leclerc, 1 Rue Professeur Marion, BP 77980, 21079 Dijon cedex, France. E-mail: fbonnetain@crgl.fr/franck.bonnetain@eortc.be.

Disclosure Summary: All authors of this paper have no conflict of interest to disclose.

## References

1. Sips JA, Mazzaferri EL 2010 Thyroid cancer epidemiology and prognostic variables. *Clin Oncol (R Coll Radiol)* 22:395–404
2. Colonna M, Bossard N, Guizard AV, Remontet L, Grosclaude P, le réseau FRANCIM 2010 Descriptive epidemiology of thyroid cancers in France: incidence, mortality, survival. *Ann Endocrinol (Paris)* 71:95–101
3. Cooper DS, Doherty GM, Haugen BR, Haugen BR, Kloos RT, Lee SL, Mandel SJ, Mazzaferri EL, McIver B, Pacini F, Schlumberger M, Sherman SI, Steward DL, Tuttle RM 2009 Revised American Thyroid Association management guidelines for patients with thyroid nodules and differentiated thyroid cancer. *Thyroid* 19:1167–1214
4. Pacini F, Schlumberger M, Dralle H, Elisei R, Smit JW, Wiersinga W; European Thyroid Cancer Taskforce 2006 European consensus for the management of patients with differentiated thyroid carcinoma of the follicular epithelium. *Eur J Endocrinol* 154:787–803
5. Samaan NA, Schultz PN, Hickey RC, Goepfert H, Haynie TP, Johnston DA, Ordones NG 1992 The results of various modalities of treatment of well differentiated thyroid carcinomas: a retrospective review of 1599 patients. *J Clin Endocrinol Metab* 75:714–720
6. Shaha AR, Shah JP, Loree TR 1997 Low-risk differentiated thyroid cancer: the need for selective treatment. *Ann Surg Oncol* 4:328–333
7. Sanders LE, Cady B 1998 Differentiated thyroid cancer: reexamination of risk groups and outcome of treatment. *Arch Surg* 133:419–425
8. Morris DM, Boyle PJ, Stidley CA, Altobelli KK, Parnell T, Key C 1998 Localized well-differentiated thyroid carcinoma: a survival analysis of prognostic factors and 131 I therapy. *Ann Surg Oncol* 5:329–337
9. Saadi H, Kleidermacher P, Esselstyn Jr C 2001 Conservative management of patients with intrathyroidal well-differentiated follicular carcinoma. *Surgery* 130:30–35
10. Greene FL, Page DL, Fleming ID, April F 2002 AJCC/UICC cancer staging handbook: TNM classification of malignant tumors. 6th ed. New York: Springer-Verlag
11. Rosenbaum PR, Rubin DB 1983 The central role of the propensity score in observational studies for causal effects. *Biometrika* 70:41–55
12. Austin PC 2008 The performance of different propensity-score methods for estimating relative risks. *J Clin Epidemiol* 61:537–545
13. D’Agostino RB 1998 Propensity score methods for bias reduction in the comparison of a treatment to a non-randomized control group. *Stat Med* 17:2265–2281
14. Sacks W, Fung CH, Chang JT, Waxman A, Braunstein GD 2010 The effectiveness of radioactive iodine for treatment of low risk thyroid cancer: a systematic analysis of the peer reviewed literature from 1966 to April 2008. *Thyroid* 20:1235–1245
15. Hundahl SA, Fleming ID, Fremgen AM, Menck HR 1998 A National Cancer Data Base report on 53,856 cases of thyroid carcinoma treated in the U.S., 1985–1995. *Cancer* 83:2638–2648
16. Tuttle RM, Tala H, Shah J, Leboeuf R, Ghossein R, Gonen M, Brokhin M, Omry G, Fagin JA, Shaha A 2010 Estimating risk of recurrence in differentiated thyroid cancer after total thyroidectomy and radioactive iodine ablation: using response to therapy variables to modify the initial risk estimates predicted by the new American Thyroid Association system. *Thyroid* 20:1341–1349
17. Hay ID, McConehey WM, Goellner JR 2002 Managing patients with papillary thyroid carcinoma : insights gained from the Mayo Clinic’s experience of treating 2512 consecutive patients during 1940 through 2000. *Trans Am Clin Climatol Assoc* 113:241–260
18. Sawka AM, Thephamongkhon K, Brouwers M, Thabane L, Browman G, Gerstein HC 2004 Clinical review 170: a systematic review and metaanalysis of the effectiveness of radioactive iodine remnant ablation for well-differentiated thyroid cancer. *J Clin Endocrinol Metab* 89:3668–3676
19. Podnos YD, Smith DD, Wagman LD, Ellenhorn JD 2007 Survival in

- patients with papillary thyroid cancer is not affected by the use of radioactive isotope. *J Surg Oncol* 96:3–7
20. Jonklaas J, Sarlis NJ, Litofsky D, Ain KB, Bigos ST, Brierley JD, Cooper DS, Haugen BR, Ladenson PW, Magner J, Robbins J, Ross DS, Skarulis M, Maxon HR, Sherman SI 2006 Outcomes of patients with differentiated thyroid carcinoma following initial therapy. *Thyroid* 16:1229–1242
  21. Jonklaas J, Cooper DS, Ain KB, Bigos T, Brierley JD, Haugen BR, Ladenson PW, Magner J, Ross DS, Skarulis MC, Steward DL, Maxon HR, Sherman SI; National Thyroid Cancer Treatment Cooperative Study Group 2010 Radioiodine therapy in patients with stage I differentiated thyroid cancer. *Thyroid* 20:1423–1424
  22. Albores-Saavedra J, Wu J 2006 The many faces and mimics of papillary thyroid carcinoma. *Endocr Pathol* 17:1–18
  23. Lloyd RV, Erickson LA, Casey MB, Lam KY, Lohse CM, Asa SL, Chan JK, DeLellis RA, Harach HR, Kakudo K, LiVolsi VA, Rosai J, Sebo TJ, Sobrinho-Simoes M, Wenig BM, Lac ME 2004 Observer variation in the diagnosis of follicular variant of papillary thyroid carcinoma. *Am J Surg Pathol* 28:1336–1340
  24. Franc B, de la Salmonière P, Lange F, Hoang C, Louvel A, de Roquancourt A, Vildé F, Hejblum G, Chevret S, Chastang C 2003 Interobserver and intraobserver reproducibility in the histopathology of follicular thyroid carcinoma. *Hum Pathol* 34:1092–1100
  25. Mazzaferri EL, Young RL 1981 Papillary thyroid carcinoma: a 10 year follow-up report of the impact of therapy in 576 patients. *Am J Med* 70:511–518
  26. Brierley J, Tsang R, Panzarella T, Bana N 2005 Prognostic factors and the effect of treatment with radioactive iodine and external beam radiation on patients with differentiated thyroid cancer seen at a single institution over 40 years. *Clin Endocrinol (Oxf)* 63:418–427
  27. Sawka AM, Brierley JD, Tsang RW, Thabane L, Rotstein L, Gafni A, Straus S, Goldstein DP 2008 An updated systematic review and commentary examining the effectiveness of radioactive iodine remnant ablation in well differentiated thyroid cancer. *Endocrinol Metab Clin North Am* 37:457–480, x
  28. Hay ID 2007 Management of patients with low-risk papillary thyroid carcinoma. *Endocr Pract* 13:521–533
  29. Beitz J, Gnecco C, Justice R 1996 Quality-of-life end points in cancer clinical trials: the U.S. Food and Drug Administration perspective. *J Natl Cancer Inst Monogr* 1996:7–9

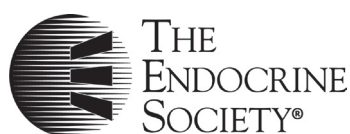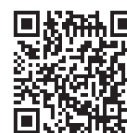

Challenge your diagnostic skills with a one-of-a-kind self-assessment resource, *Diagnostic Dilemmas: Images in Endocrinology*, edited by Leonard Wartofsky, M.D.

[www.endo-society.org/dilemmas](http://www.endo-society.org/dilemmas)
